# Supplementary material for: Disruption of Slc52a3 gene causes neonatal lethality with riboflavin deficiency in mice
Source: PubMed Central journal article supplement (PMC4897618; doi:10.1038/srep27557), 2016-06-08
Supplement: srep27557-s1.pdf [file srep27557-s1.pdf]

**Disruption of *Slc52a3* gene causes neonatal lethality with riboflavin deficiency in mice**

Hiroki Yoshimatsu<sup>1</sup>, Atsushi Yonezawa<sup>1\*</sup>, Kaori Yamanishi<sup>1</sup>, Yoshiaki Yao<sup>1</sup>, Kumiko Sugano<sup>1</sup>, Shunsaku Nakagawa<sup>1</sup>, Satoshi Imai<sup>1</sup>, Tomohiro Omura<sup>1</sup>, Takayuki Nakagawa<sup>1</sup>, Ikuko Yano<sup>1</sup>, Satohiro Masuda<sup>1,†</sup>, Ken-ichi Inui<sup>1,††</sup>, Kazuo Matsubara<sup>1</sup>

<sup>1</sup>Department of Clinical Pharmacology and Therapeutics, Kyoto University Hospital, Sakyo-ku, Kyoto 606-8507, Japan

Present affiliation: <sup>†</sup>Department of Pharmacy, Kyushu University Hospital, Fukuoka, 812-8582, Japan, <sup>††</sup>Kyoto Pharmaceutical University, Yamashina-ku, Kyoto 607-8414, Japan

### Supplementary Table S1

#### Plasma and tissue concentrations of riboflavin, FMN, and FAD in *Slc52a3*<sup>-/-</sup> mice with (+) or without (-) riboflavin supplementation (RS).

In the riboflavin-supplemented group, the pregnant dams were given 50 mg/L of riboflavin in drinking water from gestational day 0. The P0 *Slc52a3*<sup>-/-</sup> pups were sacrificed 5-9 hr after birth, and plasma and tissue concentrations of riboflavin, FMN and FAD were measured by HPLC. All data are expressed as the mean  $\pm$  SD.

Values where \* $P < 0.05$ , \*\* $P < 0.01$ , significantly different from RS (-).

|               | Riboflavin      |                    | FMN               |                   | FAD               |                   |
|---------------|-----------------|--------------------|-------------------|-------------------|-------------------|-------------------|
|               | RS (-)          | RS (+)             | RS (-)            | RS (+)            | RS (-)            | RS (+)            |
| <b>Plasma</b> | 5.38 $\pm$ 2.79 | 80.59 $\pm$ 68.41* | 81.10 $\pm$ 71.69 | 47.91 $\pm$ 38.81 | 84.52 $\pm$ 21.46 | 91.97 $\pm$ 15.94 |
| <b>Brain</b>  | 0.29 $\pm$ 0.05 | 0.85 $\pm$ 0.86    | 0.09 $\pm$ 0.02   | 0.13 $\pm$ 0.04*  | 0.84 $\pm$ 0.11   | 1.17 $\pm$ 0.18** |
| <b>Lung</b>   | 0.77 $\pm$ 0.31 | 1.59 $\pm$ 0.62*   | 0.11 $\pm$ 0.10   | 0.09 $\pm$ 0.02   | 1.61 $\pm$ 0.11   | 2.16 $\pm$ 0.35** |
| <b>Heart</b>  | 2.46 $\pm$ 1.30 | 4.82 $\pm$ 2.00*   | 0.20 $\pm$ 0.13   | 0.34 $\pm$ 0.09*  | 3.11 $\pm$ 0.83   | 8.70 $\pm$ 5.20*  |
| <b>Liver</b>  | 2.48 $\pm$ 0.89 | 4.18 $\pm$ 2.04    | 0.27 $\pm$ 0.11   | 0.33 $\pm$ 0.15   | 4.56 $\pm$ 0.49   | 7.24 $\pm$ 2.60*  |
| <b>Kidney</b> | 1.74 $\pm$ 0.42 | 3.67 $\pm$ 1.08**  | 0.26 $\pm$ 0.09   | 0.40 $\pm$ 0.07** | 1.74 $\pm$ 0.42   | 2.66 $\pm$ 0.61** |

(Unit: plasma,  $\mu$ M; tissues, nmol/g tissue)

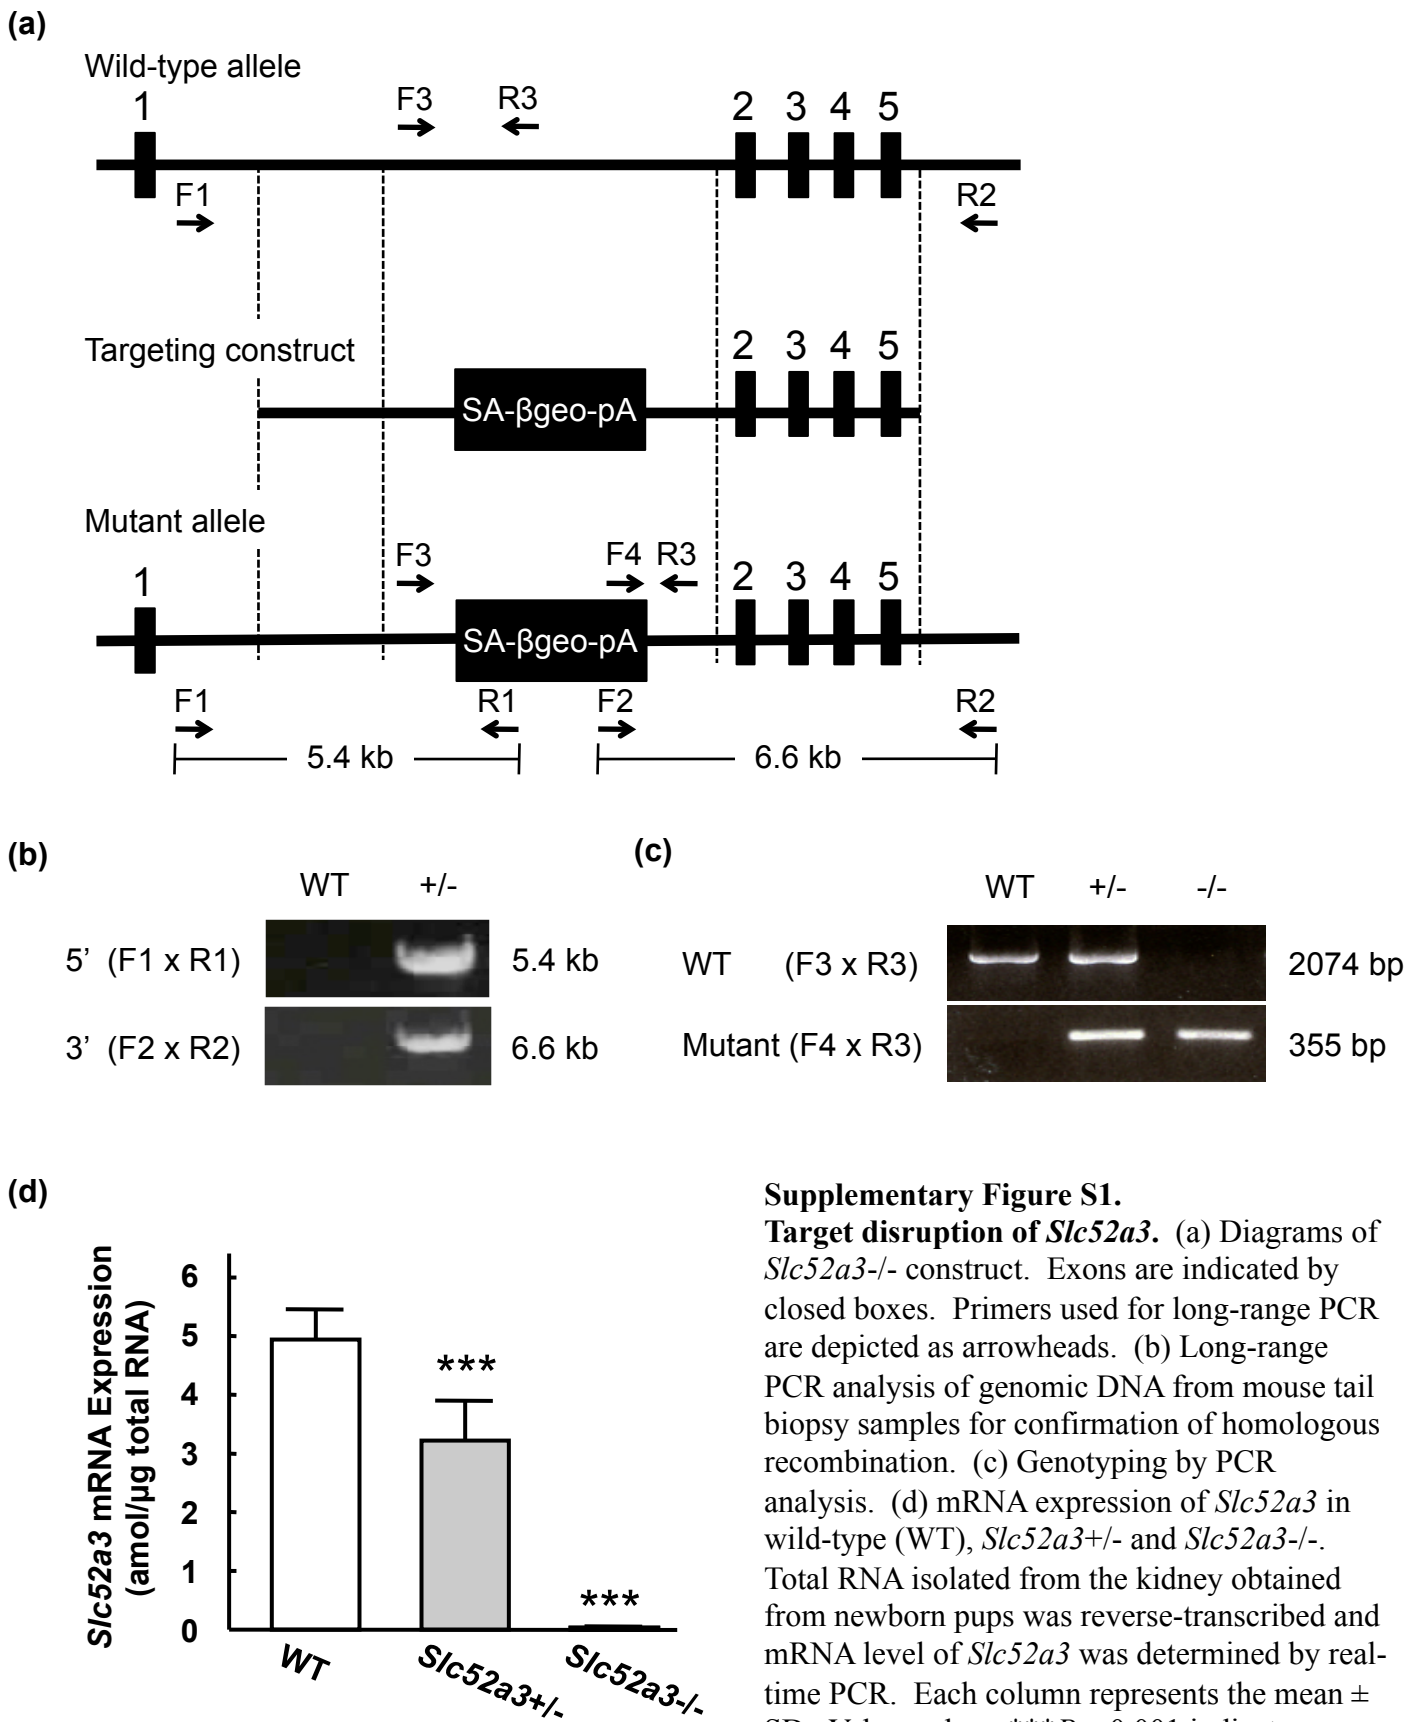

**Supplementary Figure S1.**

**Target disruption of *Slc52a3*.** (a) Diagrams of *Slc52a3*<sup>-/-</sup> construct. Exons are indicated by closed boxes. Primers used for long-range PCR are depicted as arrowheads. (b) Long-range PCR analysis of genomic DNA from mouse tail biopsy samples for confirmation of homologous recombination. (c) Genotyping by PCR analysis. (d) mRNA expression of *Slc52a3* in wild-type (WT), *Slc52a3*<sup>+/-</sup> and *Slc52a3*<sup>-/-</sup>. Total RNA isolated from the kidney obtained from newborn pups was reverse-transcribed and mRNA level of *Slc52a3* was determined by real-time PCR. Each column represents the mean  $\pm$  SD. Values where \*\*\* $P < 0.001$  indicate significant difference from WT.

WT

*Slc52a3*<sup>-/-</sup>

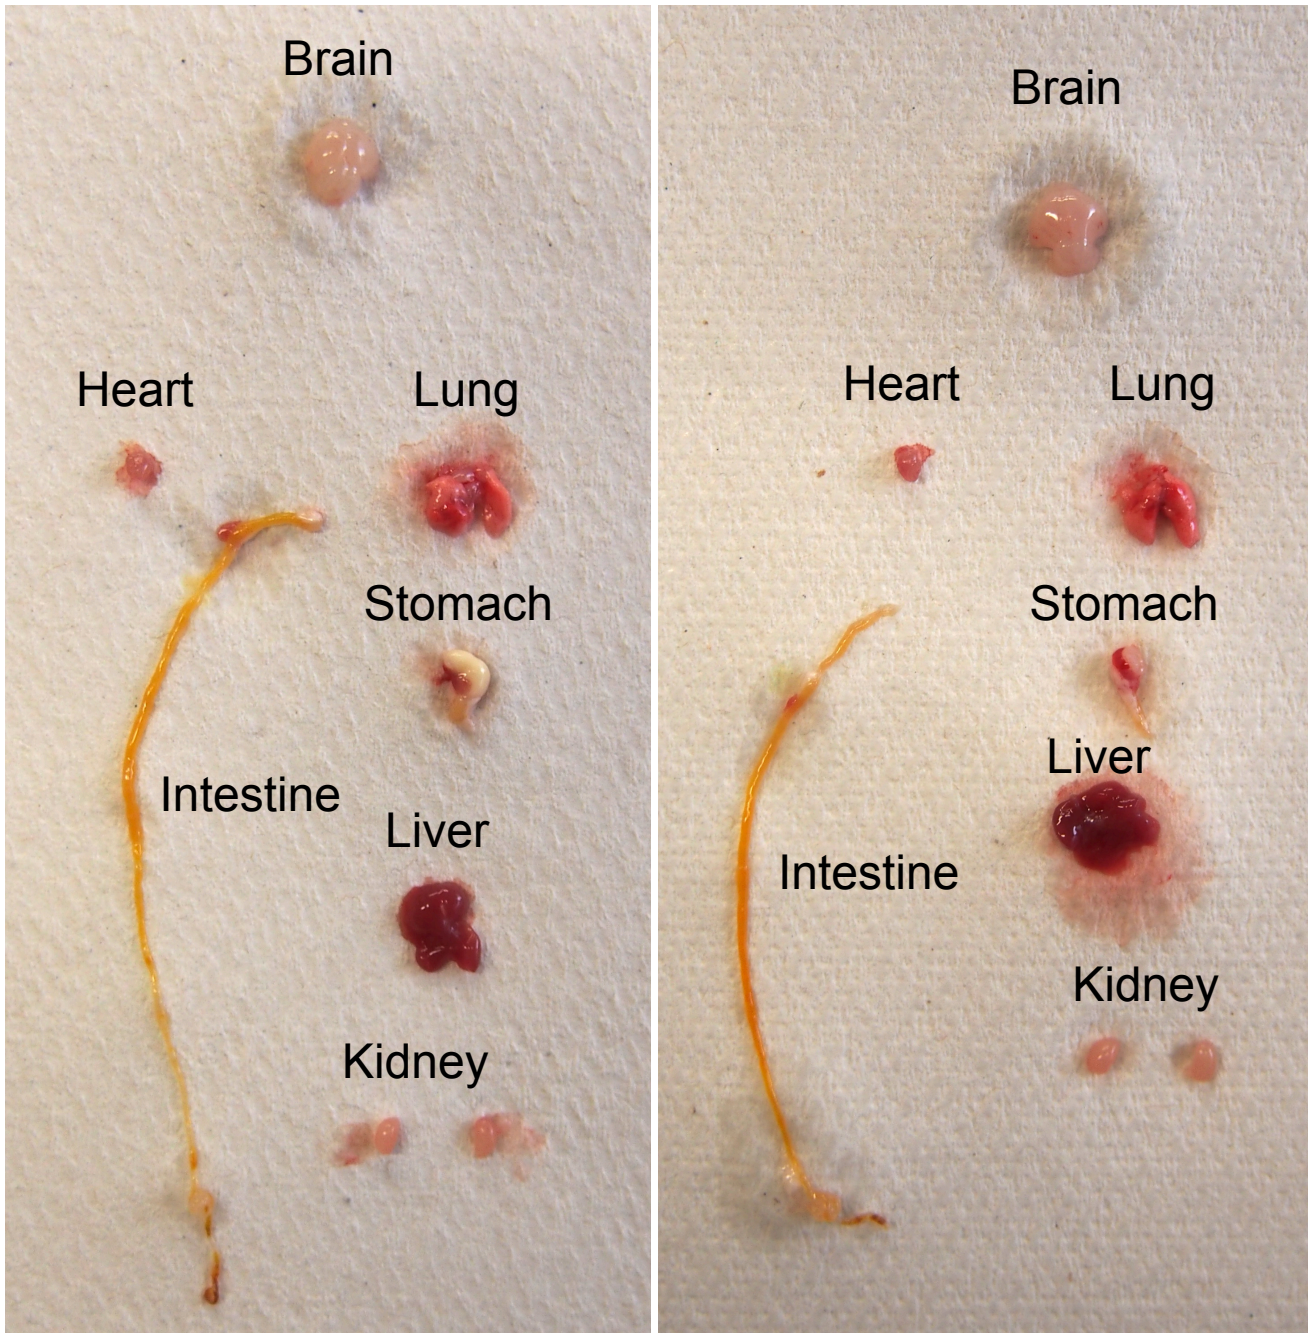

**Supplementary Figure S2. Gross appearance of tissues of *Slc52a3*<sup>-/-</sup> neonatal mice.** Tissues were obtained from WT and *Slc52a3*<sup>-/-</sup> newborn pups at postnatal day 0.

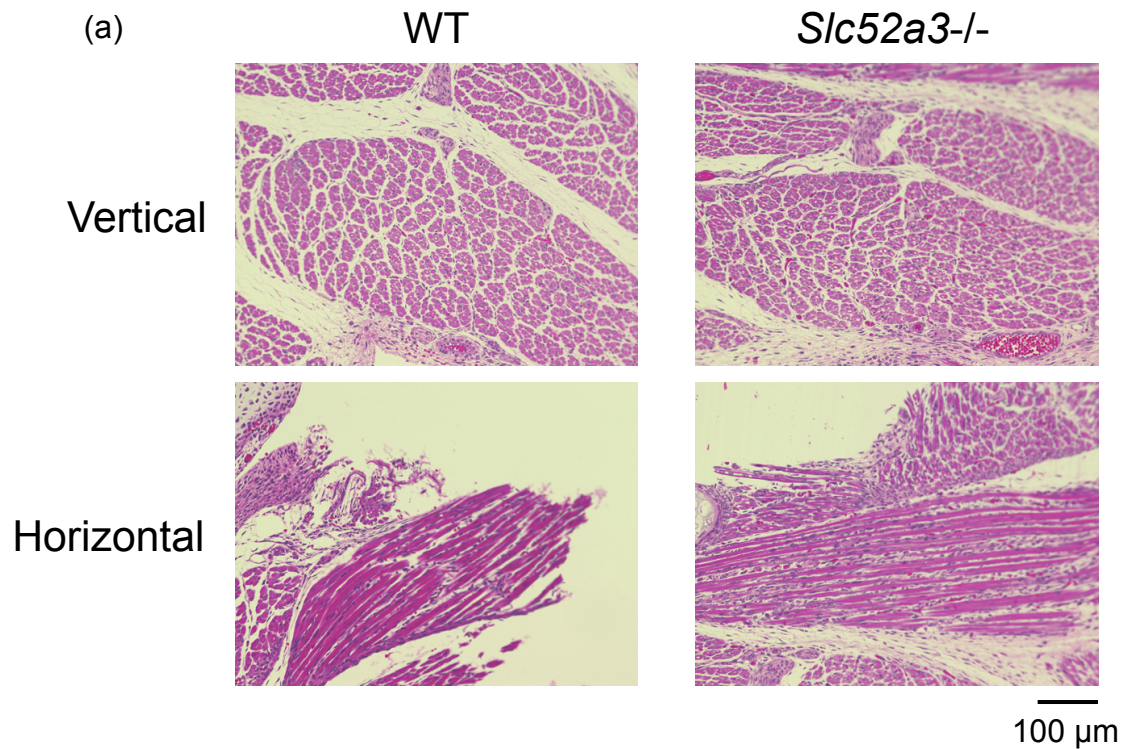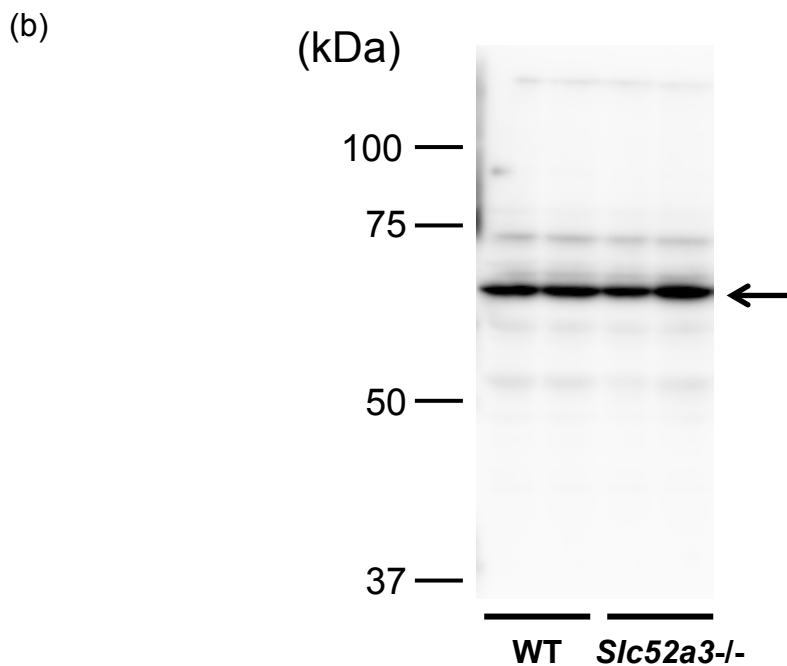

**Supplementary Figure S3. Analysis of muscle tissues in *Slc52a3*<sup>-/-</sup> neonatal mice.**

(a) Tissues were collected from WT and *Slc52a3*<sup>-/-</sup> littermates at P0 were fixed in 10% formalin and stained with hematoxylin-eosin by KAC Co., Ltd. (Kyoto, Japan). Femoral muscles were vertically and horizontally observed. (b) Western blotting analysis of femoral muscles was carried out using anti-apoptosis-inducing factor, mitochondrion-associated 1 (AIFM1) antibody. Femoral muscles were homogenized in RIPA lysis buffer, and equal amounts of protein lysate (30 μg per lane) were analyzed. Primary and secondary antibodies were anti-AIFM1 antibody (Proteintech Group Inc, 17984-1-AP) and horseradish peroxidase-conjugated anti-rabbit IgG (GE Healthcare Bio-Sciences), respectively. Representative photographs are shown.

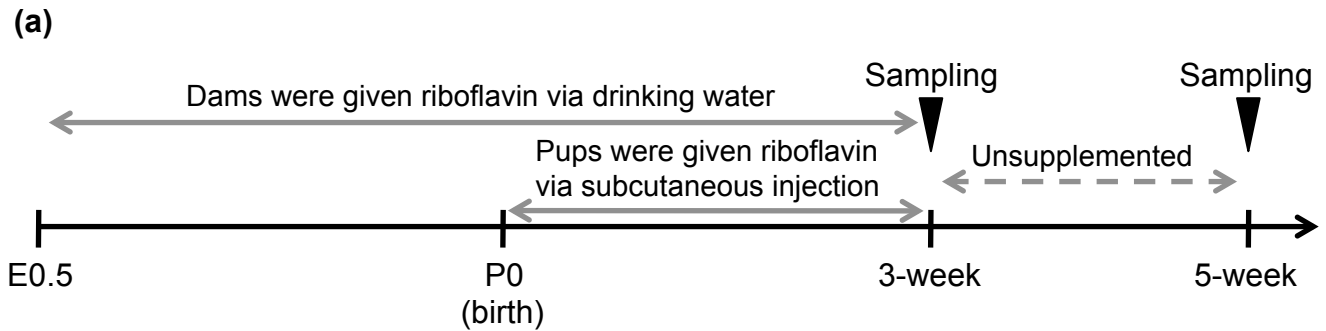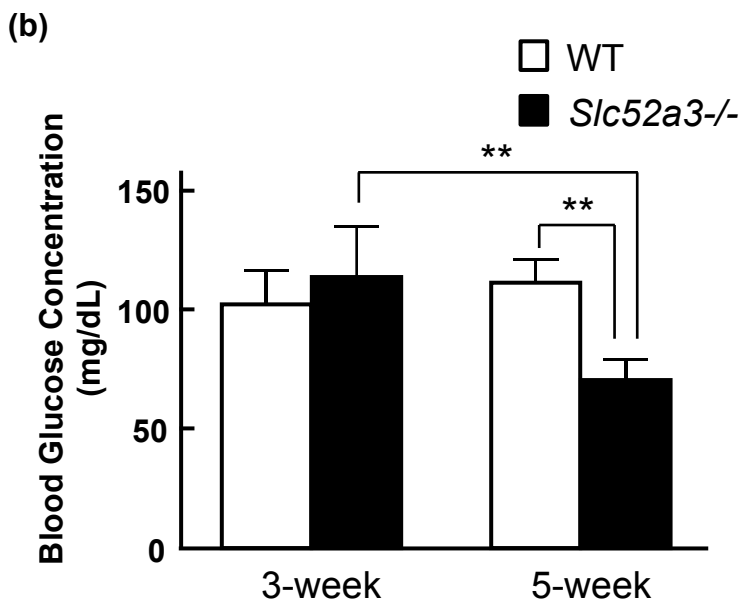

**Supplementary Figure S4. Influence of riboflavin supplementation on blood glucose level in *Slc52a3*<sup>-/-</sup> mice.**

(a) Protocol for the animal experiments. *Slc52a3*<sup>+/-</sup> mice were mated, and pregnant dams were supplemented with 50 mg/L of riboflavin in drinking water *ad libitum* from gestational day 0 to 3 weeks postpartum. Newborn pups were also administered 0.75 mg/kg riboflavin subcutaneously once a day until weaning (3-week). From 3 to 5 weeks after birth, the mice received no riboflavin supplementation. (b) Blood glucose level in WT and *Slc52a3*<sup>-/-</sup> mice at 3 weeks old (riboflavin-treated condition) or 5 weeks old (riboflavin-untreated condition). Each column represents the mean  $\pm$  SD (3-week-old WT, n=5; 3-week-old *Slc52a3*<sup>-/-</sup>, n=4; 5-week-old WT, n=5; 5-week-old *Slc52a3*<sup>-/-</sup>, n=5). Values where  $**P < 0.01$  indicate significant difference from controls (WT).
